# Supplementary material for: In vitroevolution of anl-amino acid deaminase active onl-1-naphthylalanine
Source: Royal Society of Chemistry journal article supplement (doi:10.1039/c8cy01380b), 2018-01-01
Supplement: c8cy01380b1.pdf [file c8cy01380b1.pdf]

# *In vitro* evolution of an L-amino acid deaminase active on L-1-naphthylalanine

Roberta Melis, Elena Rosini, Valentina Pirillo, Loredano Pollegioni, Gianluca Molla

Dipartimento di Biotecnologie e Scienze della Vita, Università degli Studi dell'Insubria, via J. H.

Dunant 3, 21100 Varese, Italy.

## Supplementary Materials:

**Table S1** Analysis of the genetic diversity of the libraries of PmaLAAD variants generated by site-saturation mutagenesis.

| Position                                                                                  | Original codon | Number of sequenced clones | Introduced mutation                            | Encoded residue                               | Fraction of variants (%) |
|-------------------------------------------------------------------------------------------|----------------|----------------------------|------------------------------------------------|-----------------------------------------------|--------------------------|
| <b>First-generation, single-site PmaLAAD variants (template gene: <i>PmaLAAD-00N</i>)</b> |                |                            |                                                |                                               |                          |
| L279                                                                                      | TTA            | 6                          | GGG<br>TTG<br>GTT<br>GGT<br>GGG<br>ATG         | Gly<br>Leu<br>Val<br>Gly<br>Gly<br>Met        | 100                      |
| F318                                                                                      | TTC            | 6                          | GGG<br>ACT<br>CCT<br>TTG<br>TTT<br>TGG         | Gly<br>Thr<br>Pro<br>Leu<br>Phe<br>Trp        | 100                      |
| V412                                                                                      | GTA            | 7                          | CTT<br>GCG<br>GTT<br>GTT<br>GTA*<br>AGG<br>GGG | Leu<br>Ala<br>Val<br>Val<br>Val<br>Arg<br>Gly | 86                       |
| V438                                                                                      | GTG            | 6                          | CCG<br>GCG<br>GAT<br>TCG<br>GGG<br>CAT         | Pro<br>Ala<br>Asp<br>Ser<br>Gly<br>His        | 100                      |

|                                                                                           |         |    |                                                                                                                        |                                                                                                                       |      |
|-------------------------------------------------------------------------------------------|---------|----|------------------------------------------------------------------------------------------------------------------------|-----------------------------------------------------------------------------------------------------------------------|------|
| W439                                                                                      | TGG     | 7  | TAT<br>CTG<br>CAG<br>CTG<br>TAT<br>CGG<br>AGT                                                                          | Tyr<br>Leu<br>Leu<br>Leu<br>Tyr<br>Arg<br>Ser                                                                         | 100  |
| <b>First-generation, double-site PmaLAAD variants (template gene: <i>PmaLAAD-00N</i>)</b> |         |    |                                                                                                                        |                                                                                                                       |      |
| S99/Q100                                                                                  | AGC/CAA | 10 | TAT/TGT<br>ATT/CAT<br>CTT/AAT<br>TTT/TGT<br>TTT/AGT<br>TAT/CGT<br>CAT/CAT<br>TGT/CAT<br>CAT/AAT<br>GTT/CTT<br>CAT/GTA* | Tyr/Cys<br>Ile/His<br>Leu/Asn<br>Phe/Cys<br>Phe/Ser<br>Tyr/Arg<br>His/His<br>Cys/His<br>His/Asn<br>Val/Leu<br>His/Val | 100  |
| F318/V412                                                                                 | TTC/GTA | 10 | TAT/GGT<br>TAT/ATT<br>TAT/ATT<br>TAT/TGT<br>CGT/TGT<br>AAT/TAT<br>TGT/ATT<br>TTT/GAT<br>AAT/AAT                        | Tyr/Gly<br>Tyr/Ile<br>Tyr/Ile<br>Tyr/Cys<br>Arg/Cys<br>Asn/Tyr<br>Cys/Ile<br>Phe/Asp<br>Asn/Asn                       | 100  |
| <b>Second-generation PmaLAAD variants (template gene: V412A/V438P-<i>PmaLAAD-00N</i>)</b> |         |    |                                                                                                                        |                                                                                                                       |      |
| L279                                                                                      | TTA     | 10 | CGG<br>TTA*<br>AGG<br>GAT<br>GTG<br>CTT<br>TCT<br>CCG<br>AGT<br>CGT                                                    | Arg<br>Leu<br>Lys<br>Asp<br>Val<br>Leu<br>Ser<br>Pro<br>Ser<br>Arg                                                    | 90   |
| F318                                                                                      | TTC     | 12 | CAG<br>ATT<br>CGT<br>TGG<br>GTT<br>TGG<br>CAT<br>TTT<br>GAT<br>TGG<br>CCG<br>TTC*                                      | Gln<br>Ile<br>Arg<br>Trp<br>Val<br>Trp<br>His<br>Phe<br>Asp<br>Trp<br>Pro<br>Phe                                      | 91.7 |

\* parental DNA

**Table S2** Expression and purification of wild-type PmaLAAD and variants. Proteins were purified from cells harvested from 1 L of culture. Activity values were determined on 50 mM L-Phe as substrate. (BD: below detection; ND: not determined).

| Variant                                                                           | Specific activity | Protein yield         |                         |
|-----------------------------------------------------------------------------------|-------------------|-----------------------|-------------------------|
|                                                                                   | (U/mg)            | mg/g <sub>cells</sub> | mg/L <sub>culture</sub> |
| Wild-type                                                                         | 2.90              | 1.0                   | 9.9                     |
| <b>First-generation, single-site variants (template gene: <i>PmaLAAD-00N</i>)</b> |                   |                       |                         |
| L279G                                                                             | 0.35              | 0.4                   | 4.4                     |
| F318A                                                                             | 1.36              | 0.7                   | 4.0                     |
| F318C <sup>1</sup>                                                                | 0.90              | 0.5                   | 3.5                     |
| F318G <sup>1</sup>                                                                | 0.97              | 0.7                   | 5.0                     |
| F318I <sup>1</sup>                                                                | 1.34              | 1.7                   | 8.9                     |
| F318L                                                                             | 0.89              | 0.5                   | 4.7                     |
| F318M                                                                             | 1.04              | 0.7                   | 5.8                     |
| F318V                                                                             | 0.39              | 0.7                   | 6.4                     |
| V412A                                                                             | 2.85              | 0.6                   | 5.9                     |
| V412L                                                                             | 2.99              | 0.8                   | 6.2                     |
| V412A/V438P                                                                       | 0.63              | 0.8                   | 6.1                     |
| V438G                                                                             | 0.45              | 0.6                   | 4.8                     |
| V438P                                                                             | 1.14              | 1.1                   | 6.4                     |
| <b>First-generation, double-site variants (template gene: <i>PmaLAAD-00N</i>)</b> |                   |                       |                         |
| F318C/V412L                                                                       | 0.82              | 0.4                   | 3.5                     |
| F318C/V412G                                                                       | 0.07              | 0.5                   | 3.1                     |
| F318G/V412G                                                                       | BD                | 0.5                   | 3.0                     |
| F318I/V412S                                                                       | 0.48              | 0.7                   | 7.8                     |
| F318S/V412S                                                                       | 0.12              | 0.4                   | 4.2                     |
| F318V/V412L <sup>2</sup>                                                          | ND                | ND                    | ND                      |
| F318V/V412G                                                                       | 0.32              | 1.1                   | 6.9                     |
| F318V/V412I                                                                       | 1.45              | 0.2                   | 1.6                     |
| F318V/V412S                                                                       | 0.79              | 0.1                   | 1.0                     |
| <b>Second-generation variants (template gene: <i>V412A/V438P PmaLAAD-00N</i>)</b> |                   |                       |                         |
| F318A/V412A/V438P                                                                 | 0.63              | 1.0                   | 6.7                     |

<sup>1</sup>These variants were identified in the second round of SSM.

<sup>2</sup> This variant was purified as apoprotein.

**Table S3** Apparent kinetic parameters of selected PmaLAAD variants on L-Phe and L-1-Nal.

|                                                                                   | L-Phe                |                                        |               |               |                                                             | L-1-Nal                  |                                        |                          |                                                             | Specificity constant                                                          |
|-----------------------------------------------------------------------------------|----------------------|----------------------------------------|---------------|---------------|-------------------------------------------------------------|--------------------------|----------------------------------------|--------------------------|-------------------------------------------------------------|-------------------------------------------------------------------------------|
|                                                                                   | $V_{\max}$<br>(U/mg) | $k_{\text{cat}}$<br>(s <sup>-1</sup> ) | $K_m$<br>(mM) | $K_i$<br>(mM) | $k_{\text{cat}}/K_m$<br>(s <sup>-1</sup> mM <sup>-1</sup> ) | $V_{\max}$<br>(U/mg)     | $k_{\text{cat}}$<br>(s <sup>-1</sup> ) | $K_m$<br>(mM)            | $k_{\text{cat}}/K_m$<br>(s <sup>-1</sup> mM <sup>-1</sup> ) | $(k_{\text{cat}}/K_m)_{\text{L-1-Nal}} / (k_{\text{cat}}/K_m)_{\text{L-Phe}}$ |
| <b>Wild-type</b>                                                                  | 3.00 ± 0.04          | 2.66 ± 0.04                            | 1.60 ± 0.09   | -             | 1.66 ± 0.12                                                 | 1.18 ± 0.24 <sup>1</sup> | 1.05 ± 0.21                            | 0.79 ± 0.02 <sup>1</sup> | 1.30 ± 0.29                                                 | 0.78 ± 0.25                                                                   |
| <b>First-generation, single-site variants (template gene: <i>PmaLAAD-00N</i>)</b> |                      |                                        |               |               |                                                             |                          |                                        |                          |                                                             |                                                                               |
| <b>L279G</b>                                                                      | 0.67 ± 0.17          | 0.59 ± 0.15                            | 40 ± 19       | -             | 0.01 ± 0.01                                                 | BD                       |                                        |                          |                                                             | -                                                                             |
| <b>F318A</b>                                                                      | 1.53 ± 0.1           | 1.36 ± 0.09                            | 3.76 ± 0.98   | -             | 0.36 ± 0.12                                                 | 1.15 ± 0.06              | 1.02 ± 0.05                            | 0.24 ± 0.03              | 4.3 ± 0.8                                                   | 11.9 ± 2.4                                                                    |
| <b>F318C<sup>1</sup></b>                                                          | 1.04 ± 0.07          | 0.92 ± 0.06                            | 5.7 ± 1.5     | -             | 0.16 ± 0.05                                                 | 0.65 ± 0.02              | 0.58 ± 0.02                            | 0.35 ± 0.03              | 1.7 ± 0.2                                                   | 10.6 ± 1.6                                                                    |
| <b>F318G<sup>1</sup></b>                                                          | 1.32 ± 0.23          | 1.17 ± 0.20                            | 1.87 ± 0.94   | -             | 0.63 ± 0.42                                                 | 0.98 ± 0.09              | 0.87 ± 0.08                            | 0.21 ± 0.04              | 4.1 ± 1.2                                                   | 6.5 ± 2.5                                                                     |
| <b>F318I3<sup>1</sup></b>                                                         | 1.44 ± 0.03          | 1.28 ± 0.03                            | 1.8 ± 0.2     | -             | 0.71 ± 0.09                                                 | 1.10 ± 0.10              | 0.96 ± 0.09                            | 0.31 ± 0.06              | 3.1 ± 0.9                                                   | 4.4 ± 1.4                                                                     |
| <b>F318L</b>                                                                      | 0.94 ± 0.02          | 0.83 ± 0.02                            | 0.98 ± 0.10   | -             | 0.85 ± 0.11                                                 | 0.85 ± 0.06              | 0.75 ± 0.05                            | 0.16 ± 0.03              | 4.7 ± 1.2                                                   | 5.5 ± 1.52                                                                    |
| <b>F318M</b>                                                                      | 1.09 ± 0.02          | 0.97 ± 0.02                            | 1.05 ± 0.09   | -             | 0.92 ± 0.1                                                  | 1.10 ± 0.06              | 0.98 ± 0.05                            | 0.41 ± 0.04              | 2.4 ± 0.4                                                   | 2.6 ± 0.5                                                                     |
| <b>F318V</b>                                                                      | 0.19 ± 0.01          | 0.17 ± 0.01                            | 5.95 ± 1.02   | -             | 0.03 ± 0.01                                                 | 0.13 ± 0.02              | 0.12 ± 0.02                            | 0.13 ± 0.05              | 0.9 ± 0.5                                                   | 30 ± 17                                                                       |
| <b>V412A</b>                                                                      | 3.04 ± 0.07          | 2.7 ± 0.06                             | 2.75 ± 0.26   | -             | 0.98 ± 0.11                                                 | 1.33 ± 0.17 <sup>2</sup> | 1.18 ± 0.15                            | 0.61 ± 0.13 <sup>2</sup> | 1.9 ± 0.7                                                   | 1.9 ± 0.7                                                                     |
| <b>V412A-V438P</b>                                                                | 1.59 ± 0.4           | 1.41 ± 0.35                            | 7.4 ± 2.6     | 23.5 ± 7.7    | 0.19 ± 0.11                                                 | 1.74 ± 0.29              | 1.55 ± 0.26                            | 0.52 ± 0.10              | 3.1 ± 1.1                                                   | 15.8 ± 6.2                                                                    |
| <b>V438G</b>                                                                      | 1.53 ± 0.21          | 1.36 ± 0.19                            | 3.94 ± 0.99   | 14.2 ± 3.5    | 0.35 ± 0.14                                                 | 0.84 ± 0.08              | 0.75 ± 0.07                            | 0.5 ± 0.09               | 1.5 ± 0.4                                                   | 4.3 ± 1.6                                                                     |
| <b>V438P</b>                                                                      | 2.34 ± 0.05          | 2.08 ± 0.04                            | 1.64 ± 0.08   | 47.6 ± 2.8    | 1.27 ± 0.09                                                 | 1.71 ± 0.23 <sup>2</sup> | 1.52 ± 0.21                            | 1.28 ± 0.25 <sup>2</sup> | 1.2 ± 0.4                                                   | 0.9 ± 0.4                                                                     |
| <b>First-generation, double-site variants (template gene: <i>PmaLAAD-00N</i>)</b> |                      |                                        |               |               |                                                             |                          |                                        |                          |                                                             |                                                                               |
| <b>F318V/V412G</b>                                                                | 1.02 ± 0.1           | 0.90 ± 0.09                            | 7.2 ± 1.2     | 24.8 ± 3.8    | 0.12 ± 0.03                                                 | 1.51 ± 0.02              | 1.34 ± 0.02                            | 0.27 ± 0.01              | 5.0 ± 0.26                                                  | 41.7 ± 2.4                                                                    |
| <b>F318I/V412S</b>                                                                | 0.56 ± 0.03          | 0.50 ± 0.03                            | 1.77 ± 0.48   | -             | 0.28 ± 0.09                                                 | 0.76 ± 0.07              | 0.67 ± 0.06                            | 0.08 ± 0.02              | 8.4 ± 2.9                                                   | 30 ± 10.5                                                                     |
| <b>F318C/V412L</b>                                                                | 0.99 ± 0.02          | 0.88 ± 0.02                            | 9.9 ± 0.7     | -             | 0.09 ± 0.01                                                 | 0.58 ± 0.06              | 0.51 ± 0.05                            | 0.67 ± 0.12              | 0.8 ± 0.2                                                   | 8.9 ± 2.6                                                                     |
| <b>F318C/V412G</b>                                                                | 0.17 ± 0.01          | 0.15 ± 0.01                            | 0.77 ± 0.09   | 32.9 ± 3.7    | 0.19 ± 0.03                                                 | 0.39 ± 0.02              | 0.35 ± 0.02                            | 0.15 ± 0.02              | 2.3 ± 0.44                                                  | 12.1 ± 2.5                                                                    |
| <b>F318V/V412S</b>                                                                | 0.97 ± 0.15          | 0.86 ± 0.13                            | 13.4 ± 5.4    | -             | 0.06 ± 0.03                                                 | 1.54 ± 0.3 <sup>2</sup>  | 1.37 ± 0.28                            | 0.58 ± 0.13 <sup>2</sup> | 2.4 ± 1.04                                                  | 40 ± 18                                                                       |

|                                                                                   |             |             |           |   |             |             |             |             |           |            |
|-----------------------------------------------------------------------------------|-------------|-------------|-----------|---|-------------|-------------|-------------|-------------|-----------|------------|
| <b>F318V/V412I</b>                                                                | 1.64 ± 0.07 | 1.45 ± 0.06 | 7.8 ± 1.1 | - | 0.19 ± 0.04 |             |             |             |           | BD         |
| <b>Second-generation variants (template gene: V412A/V438P-<i>PmaLAAD-00N</i>)</b> |             |             |           |   |             |             |             |             |           |            |
| <b>F318A/V412A/V438P</b>                                                          | 0.71 ± 0.02 | 0.63 ± 0.02 | 6.0 ± 0.9 | - | 0.11 ± 0.02 | 1.77 ± 0.05 | 1.57 ± 0.04 | 0.17 ± 0.01 | 9.2 ± 0.8 | 83.6 ± 7.3 |

<sup>1</sup>These variants were identified in the first-generation, double-site, SSM.

<sup>2</sup> Values estimated using the Lineweaver-Burk plot.

**Table S4. Primers used for site-saturation mutagenesis carrying the NNK or NDT degenerated codon.**

| <b>Position</b> | <b>Primers with NNK codon</b>                                                                                                                     |
|-----------------|---------------------------------------------------------------------------------------------------------------------------------------------------|
| L279            | Forward: 5'-CCAACCTTGAATGTTTACNNKTCACAACAACGTGTATC-3'<br>Reverse: 5'-GATACACGTTGTTGTGAMNNGTAAACATTCAAGGTTGG-3'                                    |
| F318            | Forward: 5'-CTTATGCTGTAGCCCCACGTATC <b>NNK</b> ACAAGCTCCATTG-3'<br>Reverse: 5'-CAATGGAGCTTGT <b>MN</b> NGATACGTGGGGCTACAGCATAAG-3'                |
| V412            | Forward: 5'-GAACGTTGGGGTGCAGTT <b>NNK</b> AGTCCAACATTTGATG-3'<br>Reverse: 5'-CATCAAATGTTGGACT <b>MN</b> NAACTGCACCCCAACGTTC 3'                    |
| V438            | Forward: 5'-CAATACAGCGACANN <b>NK</b> TGGGGAATGACAGAAGGTCC-3'<br>Reverse: 5'-GGACCTTCTGTCATTCCCC <b>MN</b> NTGTCGCTGTATTG-3'                      |
| W439            | Forward: 5'-CAATACAGCGACAGTG <b>NNK</b> GGAATGACAGAAGGTCC-3'<br>Reverse: 5'-GGACCTTCTGTCATTCC <b>MN</b> NC ACTGTCGCTGTATTG-3'                     |
| <b>Position</b> | <b>Primers with NDT codon</b>                                                                                                                     |
| F318            | Forward: 5'-CTTATGCTGTAGCCCCACGTATC <b>NDT</b> ACAAGCTCCATTG-3'<br>Reverse: 5 -CAATGGAGCTTGT <b>AH</b> NGATACGTGGGGCTACAGCATAAG-3'                |
| V412            | Forward: 5'-GAACGTTGGGGTGCAGTT <b>NDT</b> AGTCCAACATTTGATG-3'<br>Reverse : 5'-CATCAAATGTTGGACT <b>AH</b> NNAACTGCACCCCAACGTTC-3'                  |
| S99/Q100        | Forward: 5'-GAGCAATCAGGCCGCGCATA <b>CNDTNDT</b> ATCATTAGCTACCAAACGTC-3'<br>Reverse: 5'-GACGTTTGGTAGCTAATGATA <b>HAH</b> NGTATGCGCGGCCTGATTGCTC-3' |

**Figure S1**

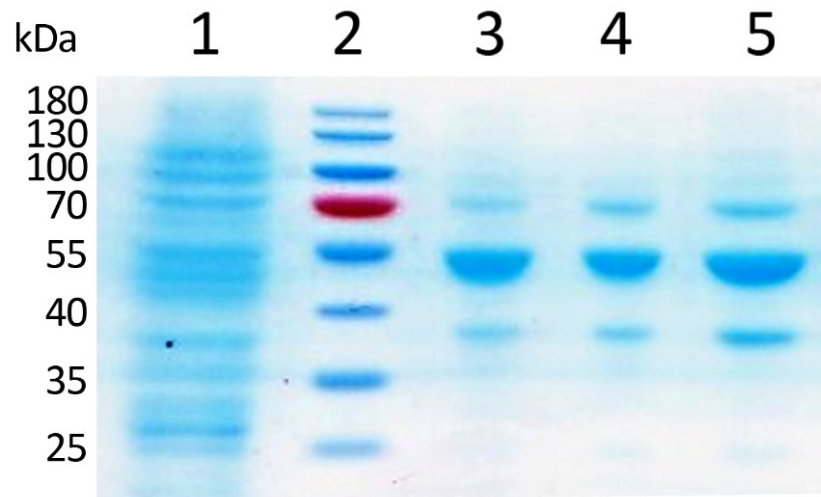

**Figure S1** SDS-PAGE analysis of selected purified PmaLAAD variants. Lane 1: crude extract (80  $\mu$ g); lane 2: LMW markers (Prestained Protein Ladder, PageRuler™); lane 3: wild-type PmaLAAD; lane 4: V412A/V438P variant; lane 5: F318A/V412A/V438P variant. For each lane 5  $\mu$ g of total proteins were loaded.

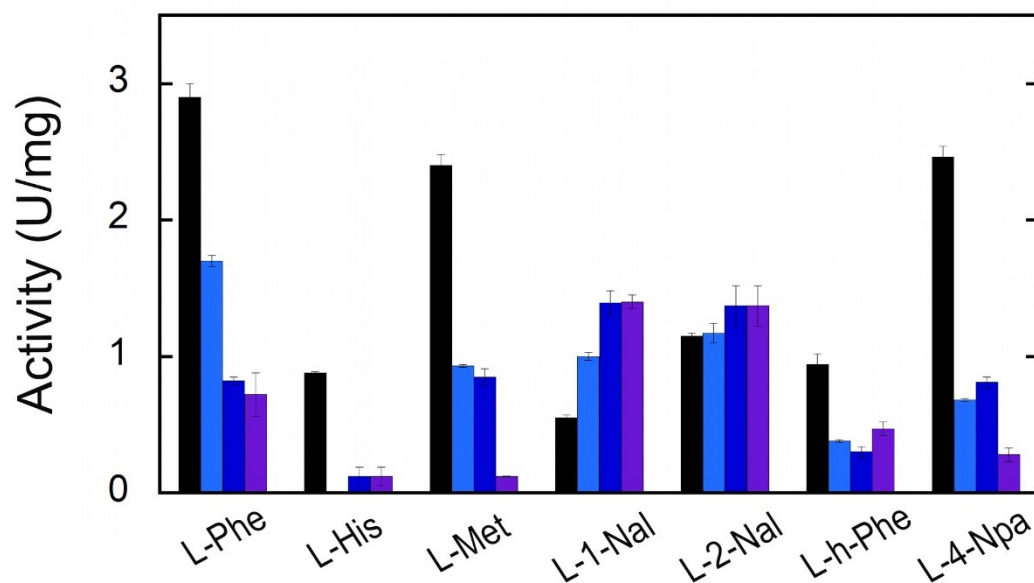

**Figure S2**

**Figure S2** Substrate scope (reported as specific activity) of wild-type (black), F318A (cyan), V412A/V438P (blue), and F318A/V412A/V438P (purple) PmaLAAD variants. The enzymatic activity was measured using the polarographic assay. The enzymatic activity was determined on different natural and synthetic L-amino acids: 50 mM L-Phe, 50 mM L-His, 50 mM L-Met, 1.2 mM D,L-1-naphthylalanine (D,L-1-Nal), 1.2 mM D,L-2-naphthylalanine (D,L-2-Nal), 0.7 mM D,L-1-naphthylglycine (D,L-1-NGly), 0.7 mM D,L-2-naphthylglycine (D,L-2-NGly), 5 mM D,L-homophenylalanine (D,L-h-Phe), and 10 mM L-4-nitrophenylalanine (L-4-Npa) under standard conditions (50 mM potassium phosphate, pH 7.5, 25 °C and at air saturation).



Figure S3

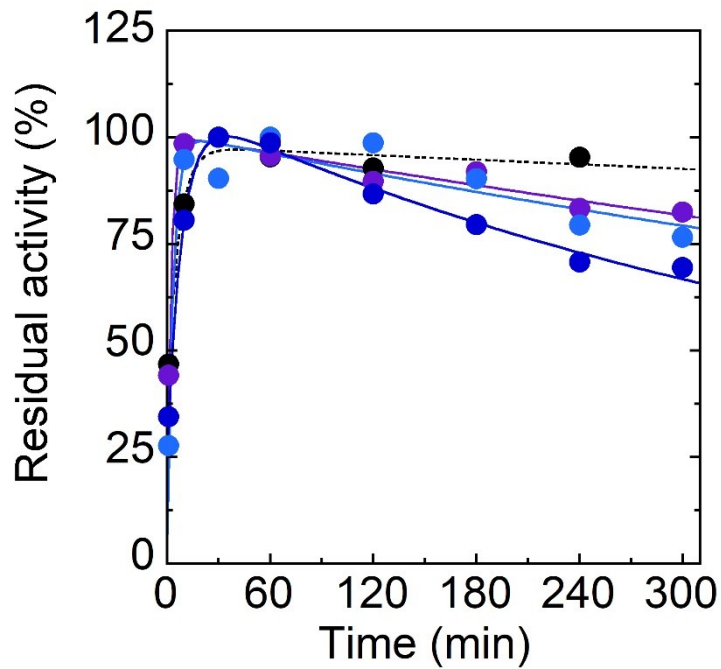

**Figure S3** Time course of enzymatic activity of wild-type PmaLAAD and selected variants at 25 °C in presence of *E. coli* membranes added before starting the experiment. Wild-type PmaLAAD,  $k_{\text{fast}} = 9.09 \pm 1.65 \text{ min}^{-1}$ ,  $k_{\text{slow}} = 0.018 \pm 0.004$  (black); F318A,  $k_{\text{fast}} = 17.3 \pm 9.8$ ,  $k_{\text{slow}} = 0.06 \pm 0.05 \text{ min}^{-1}$  (cyan); V412A/V438P,  $k_{\text{fast}} = 7.0 \pm 0.7 \text{ min}^{-1}$ ,  $k_{\text{slow}} = 0.14 \pm 0.01 \text{ min}^{-1}$  (blue); V412A/V438P/F318A,  $k_{\text{fast}} = 25.1 \pm 16.3 \text{ min}^{-1}$ ,  $k_{\text{slow}} = 0.04 \pm 0.02 \text{ min}^{-1}$  (purple). We defined  $k_{\text{fast}}$  as the rate of PmaLAAD re-activation following membrane addition and  $k_{\text{slow}}$  as the rate of PmaLAAD inactivation during the subsequent incubation at 25 °C.

Figure S4

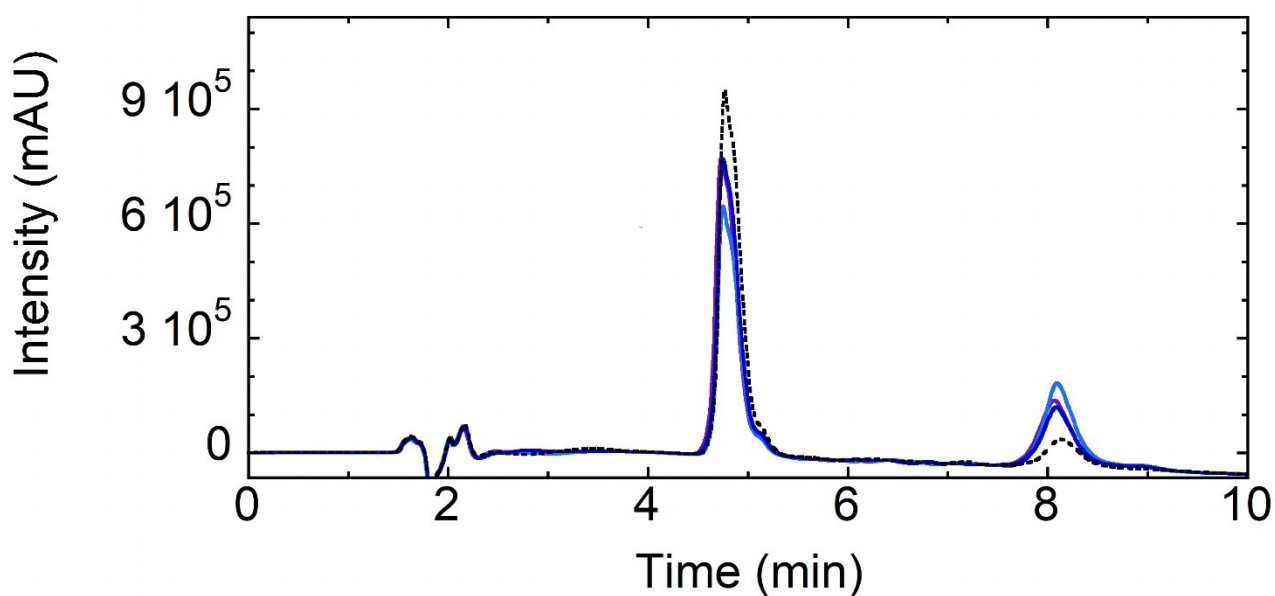

**Figure S4.** HPLC chromatograms after 10 min of bioconversion of D,L-1-Nal (retention time = 4.7 min) to 1-naphthylpyruvate (retention time = 8.1 min) catalyzed by wild-type PmaLAAD (dashed line) or the F318A (cyan), V412A/V438P (blue), and F318A/V412A/V438P (purple). Conditions: 1.2 mM substrate, 0.05 mg/mL PmaLAAD-00N or different PmaLAAD variants, *E. coli* membranes, pH 7.5, 25 °C (1.0 mL).

## **Optimization of F318A/V412A/V438P PmaLAAD expression**

### **Optimization of expression conditions**

Starter cultures were prepared by growing a single colony of *E. coli* BL21(DE3) cells carrying the recombinant pET11a-PmaLAAD-00N or pET11a-PmaLAAD-F318A/V412A/V438P plasmid overnight at 37 °C in flasks containing TB broth to which 100 µg/mL ampicillin was added. These cultures were diluted with the same media to a starting OD<sub>600nm</sub> of 0.1 and then incubated at 37 °C on a rotatory shaker at 200 rpm. Experiments were carried out in 500 mL baffled Erlenmeyer flasks containing 125 mL of liquid media at 37 °C and 200 rpm. Both the optical density and the pH value of the medium were assayed every hour. Growth curves were generated by the interpolation of OD<sub>600nm</sub> values according to the Gompertz equation (Zwietering et al., 1990).

In order to optimize F318A/V412A/V438P PmaLAAD production in *E. coli* BL21(DE3) cells, the effect of adding 0.1 mM IPTG at different phases of the growth curve (corresponding to OD<sub>600</sub> of 0.5, 2, 5), of the temperature of growth (28 or 15 °C), and of the time of cell harvest (4 h or overnight after IPTG addition) on protein expression was investigated. The LAAD enzymatic activity of crude extracts (50 µL) was determined by using the polarographic assay (see below) on 1.2 mM D,L-1-Nal. Since the F318A/V412A/V438P PmaLAAD showed the most interesting enzymatic properties, the expression conditions of this recombinant enzyme in BL21(DE3) *E. coli* cells were optimized using a *semi*-factorial design approach. The growth curve of the variant was almost superimposable to the one of the PmaLAAD-00N wild-type with almost identical Gompertz equation parameters (Figure S5a). The temperature, induction growth phase, and the interval between IPTG addition and cell harvesting were evaluated. The best expression condition was: adding 0.1 mM IPTG at OD<sub>600nm</sub> = 2.0 (corresponding to a mid-exponential growth phase) and collecting cells after overnight growth at 28 °C (condition 4). Under these conditions, a 4.5-fold higher volumetric yield (235 U/L) was reached than the one obtained under standard conditions (i.e., induction at OD<sub>600nm</sub> = 0.5 and collecting cells

after 4 hours at 28 °C). This result is due to a 2-fold increase in enzyme activity value per gram of cells and of the biomass accumulation (Table S5 and Figure S5b).

M.H. Zwietering, I. Jongenburger, F.M. Rombouts, and K. Van't Riet, *App. Env. Microbiol.*, 1990, **56**, 1875-1881.

**Table S5**

Conditions tested for the recombinant expression of F318A/V412A/V438P PmaLAAD variant.

| <b>Conditions</b>                                              | <b>g of cells</b> |
|----------------------------------------------------------------|-------------------|
| 1; OD <sub>600 nm</sub> = 0.5, 28 °C, harvest time = 4 h       | 1.15              |
| 2; OD <sub>600 nm</sub> = 0.5, 28 °C, harvest time = overnight | 2.52              |
| 3; OD <sub>600 nm</sub> = 2, 28 °C, harvest time = 4 h         | 2.04              |
| 4; OD <sub>600 nm</sub> = 2, 28 °C, harvest time = overnight   | 2.18              |
| 5; OD <sub>600 nm</sub> = 5, 28 °C, harvest time = 4 h         | 2.26              |
| 6; OD <sub>600 nm</sub> = 5, 28 °C, harvest time = overnight   | 2.73              |
| 7; OD <sub>600 nm</sub> = 0.5, 15 °C, harvest time = 4 h       | 0.41              |
| 8; OD <sub>600 nm</sub> = 0.5, 15 °C, harvest time = overnight | 2.06              |
| 9; OD <sub>600 nm</sub> = 2, 15 °C, harvest time = 4 h         | 1.09              |
| 10; OD <sub>600 nm</sub> = 2, 28 °C, harvest time = overnight  | 2.32              |
| 11; OD <sub>600 nm</sub> = 5, 15 °C, harvest time = 4 h        | 1.99              |
| 12; OD <sub>600 nm</sub> = 5, 15 °C, harvest time = overnight  | 2.66              |

Experiments were carried out in 500 mL baffled Erlenmeyer flasks containing 125 mL of TB broth.

Figure S5

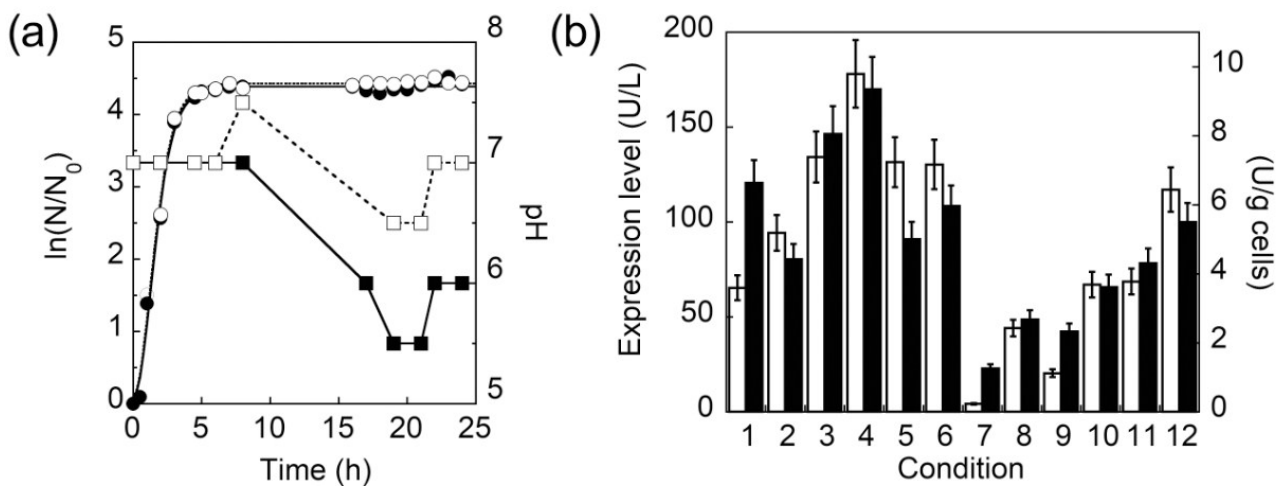

**Figure S5:** (a) Growth curve of BL21(DE3) *E. coli* cells carrying the pET11b-PmaLAAD-00N (○) or the pET11b-PmaLAAD-F318A/V412A/V438P (●) plasmid in Terrific broth. pH of the growing medium (PmaLAAD-00N, ○; F318A/V412A/V438P variant, ●). (b) Expression yields of F318A/V412A/V438P PmaLAAD under different conditions (conditions reported in Table S5). The activity values were determined under standard conditions on 1.2 mM D,L-1-Nal as a substrate (i.e. in the presence of *E. coli* membranes at pH 7.5, 25 °C).
